# Supplementary material for: Multivalent presentation of carbohydrates by 314-helical peptide templates: synthesis, conformational analysis using CD spectroscopy and saccharide recognition
Source: Royal Society of Chemistry journal article supplement (doi:10.1039/c5ob01673h), 2015-01-01

## Supporting Information

### “Multivalent Presentation of Carbohydrates by 3<sub>14</sub>-Helical Peptide Templates: Synthesis, Conformational Analysis by CD Spectroscopy and Saccharide Recognition”

Nitin J. Pawar,<sup>a,b</sup> Ulf Diederichsen<sup>b\*</sup> and Dilip. D. Dhavale<sup>a\*</sup>

<sup>a</sup>Department of Chemistry, Garware Research Centre, Savitribai Phule Pune University (Formerly University of Pune), Pune - 411 007, India

<sup>b</sup>Institute of Organic and Biomolecular Chemistry, Georg-August University Göttingen, Tammannstrasse 2, D-37077 Göttingen, Germany

Dilip D. Dhavale\* - [ddd@chem.unipune.ac.in](mailto:ddd@chem.unipune.ac.in)

Ulf Diederichsen\* - [udieder@gwdg.de](mailto:udieder@gwdg.de)

#### INDEX

| Sr. No. | Content                                                          | Page no. |
|---------|------------------------------------------------------------------|----------|
| 1       | <sup>1</sup> H and <sup>13</sup> C NMR spectrum for new compound | 2-2      |
| 2       | HPLC traces of purified glycoconjugates <b>1-7</b>               | 3-3      |

1)  $^1\text{H-NMR}$  and  $^{13}\text{C-NMR}$  Spectra of new compound

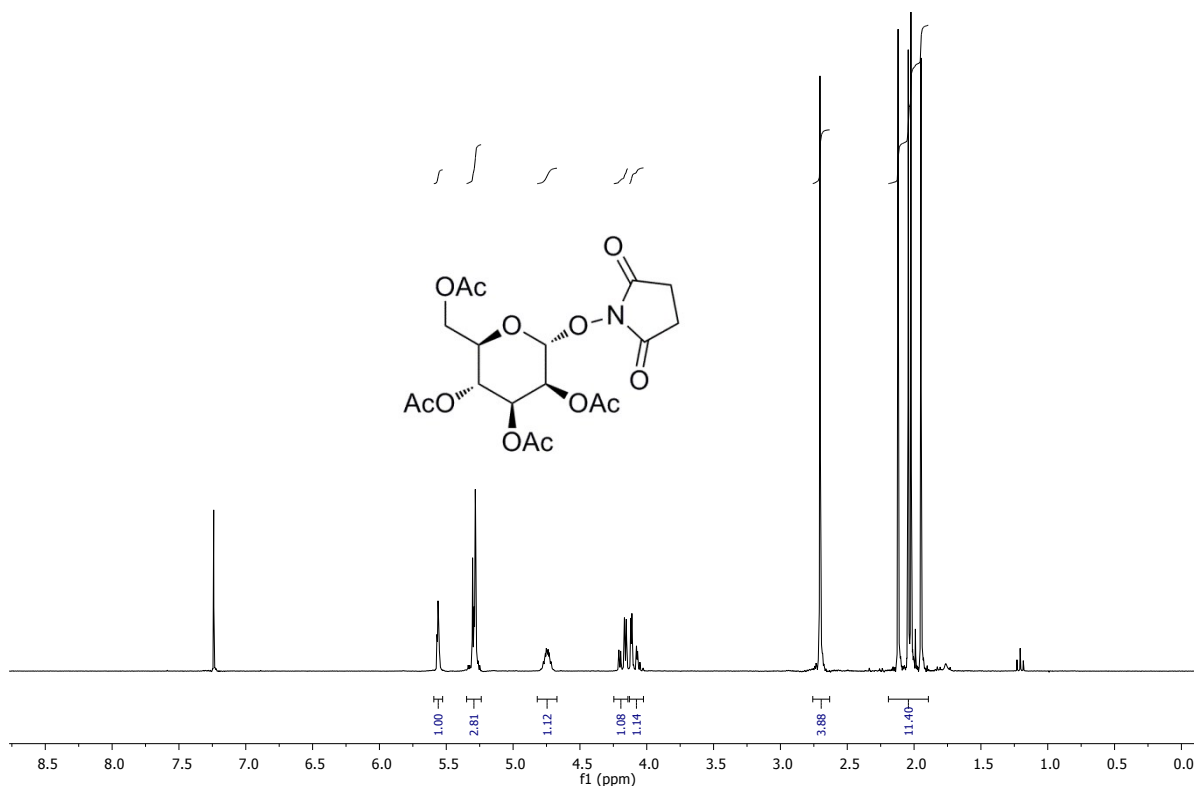

Figure 1:  $^1\text{H-NMR}$  (300 MHz,  $\text{CDCl}_3$ ) spectrum of 2,3,4,6-tetra-*O*-acetyl- $\alpha$ -D-mannopyranosyl-*N*-oxysuccinimide

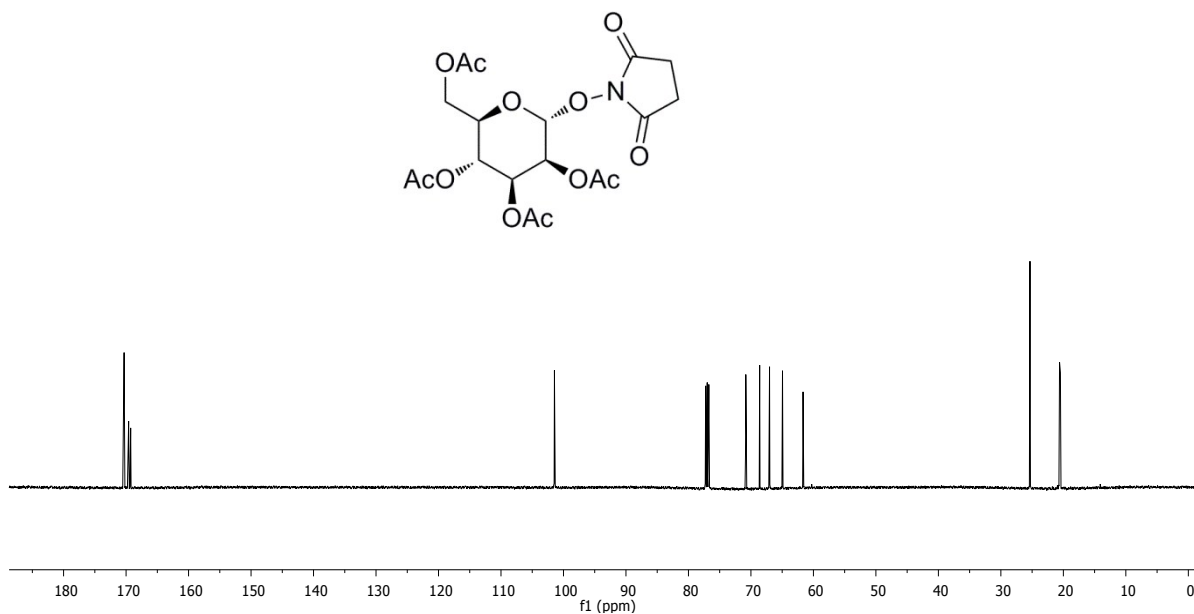

Figure 2:  $^{13}\text{C-NMR}$  (125 MHz,  $\text{CDCl}_3$ ) spectrum of 2,3,4,6-tetra-*O*-acetyl- $\alpha$ -D-mannopyranosyl-*N*-oxysuccinimide

2) HPLC traces of purified glycoconjugates 1-7.

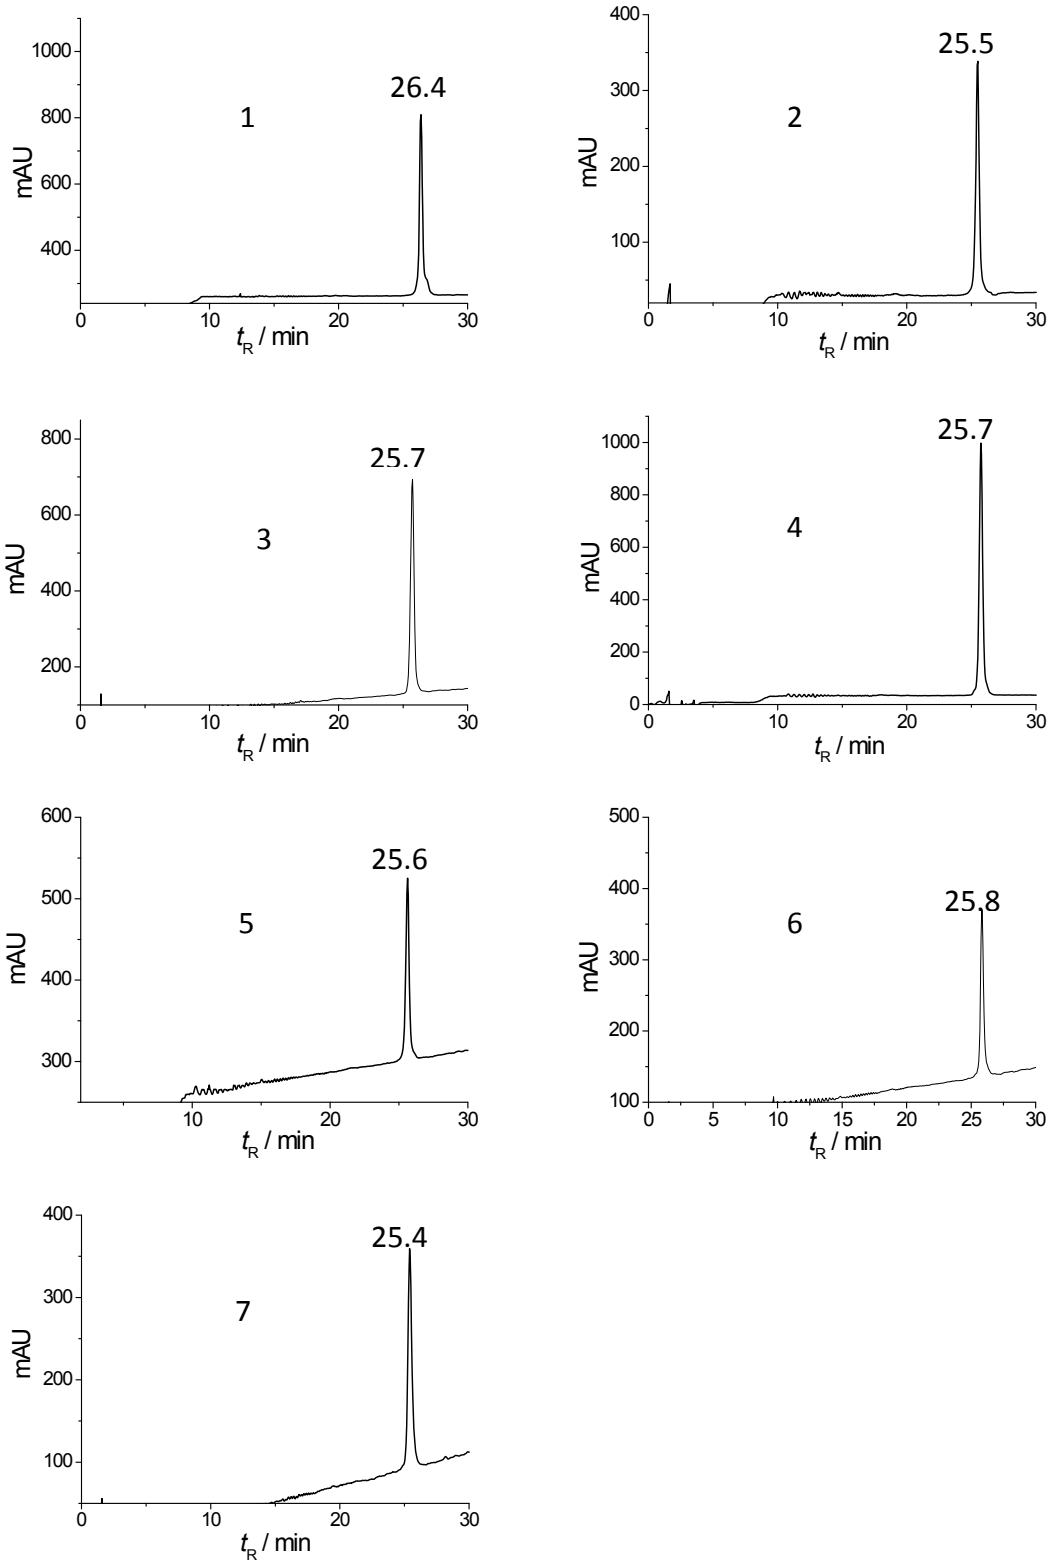

Supplement: c5ob01673h1.pdf [file c5ob01673h1.pdf]
